# Supplementary material
Source: Research Square preprint supplement (doi:10.21203/rs.3.rs-9935258/v1)
Supplement: Supplementary file 1 [file 2e723be7d8b2c7786e5ce572.docx]

**
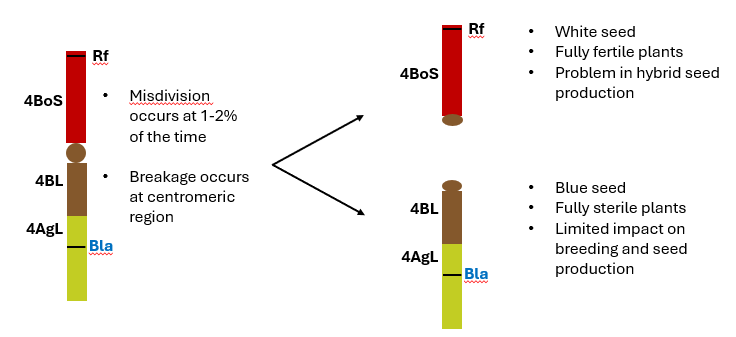
**

**Extended Data Fig. 1** **Illustration showing misdivision of the BLA chromosome at centromere, resulting in white fertile and blue sterile seed.**

**
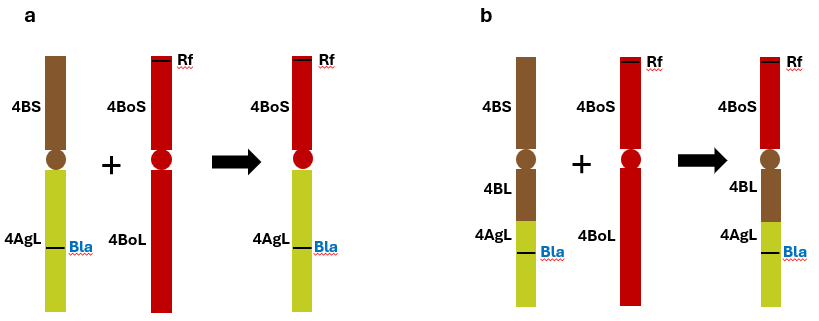
**

**Extended Data Fig. 2** **Models on the generation of BLA chromosome.** **a**, The BLA chromosome generation through Robertsonian translocation between a whole-arm translocation T4BS.4AgL and chromosome 4Bo of *Triticum boeoticum* proposed by Li (2023). **b**, The correct model of BLA chromosome development where T4BoS.4BL-4AgL was generated through Robertsonian translocation between a translocation of T4BS.4BL-4AgL and chromosome 4Bo of *T. boeoticum*.

**Extended Data Fig. 3** **Markers for the BLA system**. **a**, Marker 4BS-HX detects the Probus deletion. Agarose gel showing the bands amplified on Chinese Spring (CS; wildtype), CS Nulli-Tetra (NT) group 4 lines, blue fertile lines (Probus homozygous plant with BLA chromosome), white sterile lines (Probus homozygous plant without BLA chromosome), and white fertile lines (no Probus deletion). **b**, A QIAxcel gel image showing segregation of Probus and BLA chromosome in six progenies of BLA backcross lines (BC1F2) using markers 4BS-HX, ThMYC4E, and Rf-Ms1. **c**, Electropherogram of QIAxcel image of samples B6, B7, and B8 in **b**. Marker 4BS-HX can identify the homozygous Probus (B6, no 4BS-HX peak), the heterozygous Probus (B8, the 4BS-HX peak is lower than the 50% of the 4A,4D-HX peak), and the wildtype without Probus deletion (B7).

**
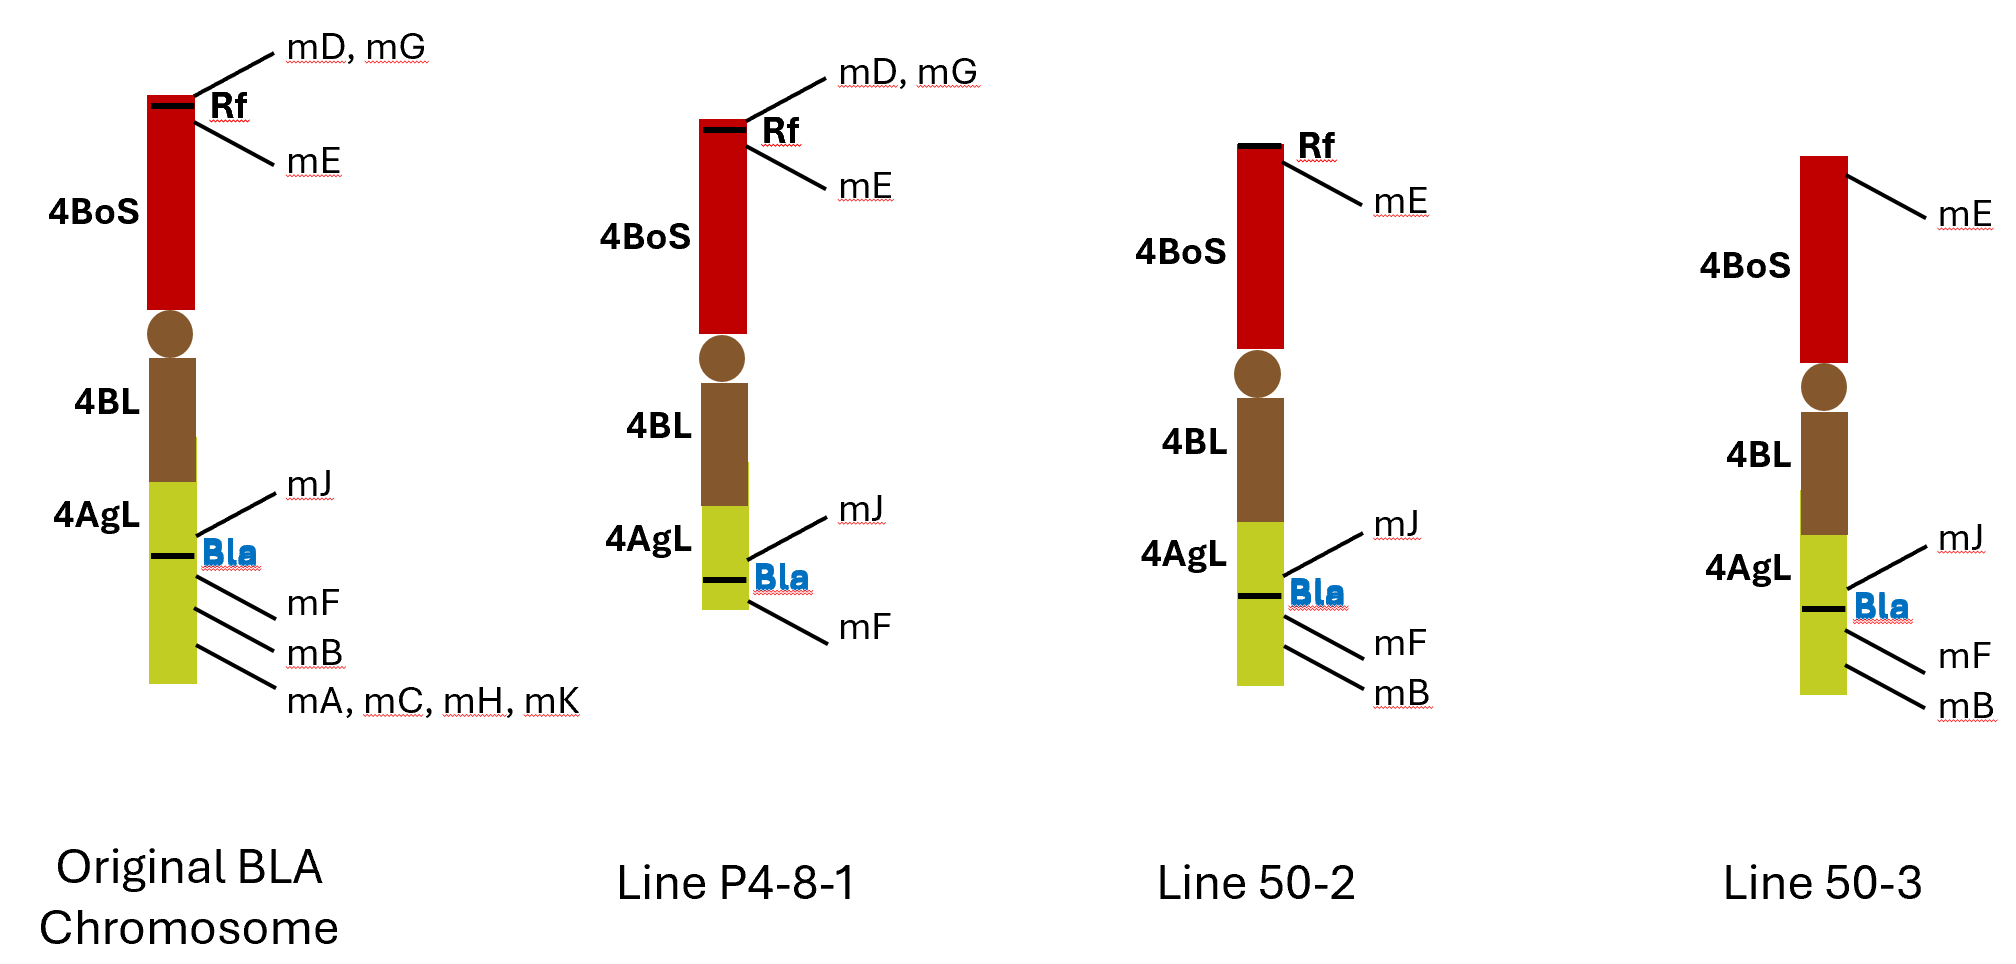
**

**Extended Data Fig. 4 Alien specific markers A to K**. BLA lines (original and deletion lines*), confirmed by cytology and phenotyping, were screened using alien-specific markers A to K. The approximate locations of these markers were determined. Note: Marker F could be on either side of the blue aleurone gene; it is co-segregating with blue phenotype. *Deletion lines were generated from homoeologous recombination under the *ph1b* condition. The chromosome structures were confirmed by FISH and GISH cytological analyses and molecular markers. Phenotyping determined the presence or absence of blue color locus.

**Extended Data Fig. 5 Genotyping of the BLA elements in IR349 and the original BLA. a**, Five IR349 sister lines and the original BLA line contain *Rf-Ms1*, the Probus deletion, and the three-gene cluster. Chinese Spring does not have any of them. Co-dominant markers were used for these three elements. **b**, Both *MYC616* and *MYB618* are present in five IR349 sister lines and the original BLA line. Gene specific markers were used for these two genes.

**Extended Data Table 1. Types and frequencies of progeny from self-pollinating a monosomic addition line**

| **Eggs** | **Pollen** | |
| --- | --- | --- |
| 21 chromosomes | 22 chromosomes |
| 96% (81-99) | 4% (1-19) |
| 21 chromosomes | 42 chromosomes (white) | 43 chromosomes (single blue) |
| 75% (61-86) | 72% (49-85) | 3% (0.6-16) |
| 22 chromosomes | 43 chromosomes (single blue) | 44 chromosomes (double blue) |
| 25% (14-39) | 24% (11-39) | 1% (0.1-7) |

Modified after Morris and Sears39

**Extended Data Table 2**. **Summary of oligo design on the four key BLA system loci**

| **Locus** | **Chromosome Region** | **Probe Count** | **True Range (nt)** | **Probe Density**  **(Probes/kb)** |
| --- | --- | --- | --- | --- |
| Locus_1_*Ms1* | chrBLA:3132784-3234532 | 778 | 94,454 | 8.24 |
| Locus_2_3-gene cluster | chrBLA:479952968-480157005 | 451 | 202,017 | 2.23 |
| Locus_3_*MYC_616* | chrBLA:616586904-616689632 | 390 | 102,376 | 3.81 |
| Locus_4_*MYB_618* | chrBLA:617970289-618071327 | 266 | 95,088 | 2.8 |

| **Extended Data Table 3. Probus related SNPs and their corresponding genomic positions.** | | | | |
| --- | --- | --- | --- | --- |
| **Index on iSelect 90K SNP bead chip** | **SNP id** | **SNP name** | **Position in Probus** | **Position on 4B (bp)** (IWGSC RefSeq v1.0) |
| 32857 | IWB32857 | GENE-2267_230 | outside deletion | 10,591,726 |
| 69062 | IWB69062 | Tdurum_contig25403_648 | inside deletion | 11,675,463 |
| 33641 | IWB33641 | GENE-3866_301 | inside deletion | 12,230,352 |
| 80662 | IWA7268 | wsnp_Ku_c7180_12403155 | inside deletion | 12,891,978 |
| 34257 | IWB34257 | GENE-4933_1085 | inside deletion | 14,122,723 |
| 73600 | IWB73600 | Tdurum_contig82942_681 | inside deletion | 15,416,556 |
| 49194 | IWB49194 | Kukri_rep_c106598_114 | inside deletion | 16,056,985 |
| 27329 | IWB27329 | Excalibur_c52594_88 | outside deletion | 16,059,211 |

**Extended Data Table 4. Primers for molecular markers.**

| **Marker Name** | **Primer Name** | **Primer Sequence (5' to 3')** | **Marker Type** |
| --- | --- | --- | --- |
| Probus | 4BS-HX-F2 | GCTCGTTGTCTTCATGCC | Codominant |
|  | 4BS-HX-R2 | AGCTTCTCGTCCTTCTAAGC |  |
| Rf-Ms1 | Ms1BoEx3-F2 | GCCGCGGCGACCTCGT | Specific |
|  | Ms1m-R | ACTCAGAGGATGAGGTAGAGGCCGAT |  |
| ThMYC4E | ThMYC4ESpF | CTCCCAGTCAGGAACAGC | Specific |
|  | ThMYC4ESpR | GGTGACAGTGAGGCGGTT |  |
| Alien_mA | 5565329F | TGCAGTGATCCCGATGCCG | Specific |
|  | 5565329R | CTCGGTGCGATGTGTGG |  |
| Alien_mB | 5570804F | TGCAGGATTTTCCACTGATTAAC | Specific |
|  | 5570804R | CGGAGGTGGTACGCGGTG |  |
| Alien_mC | 5564956F | TGCAGAACTACCAGAATCTTTATCGG | Specific |
|  | 5564956R | CTGTGAAACCAAGCACCCATAATC |  |
| Alien_mD | 5008421F | TGCAGAGCAAGAGCAACATTCAA | Specific |
|  | 5008421R | CGGTCAATGTATAAACCACGTGC |  |
| Alien_mE | 3573220F | TGCAGTCAGTCAACGATGG | Specific |
|  | 3573220R | GTCTCACGTGCAGCGCA |  |
| Alien_mF | 5565375F | TGCAGTTTCTATCATGTCCACG | Specific |
|  | 5565375R | ATCTCGGGTTTATCTTCAGGG |  |
| Alien_mG | 1861695F | TGCAGGTGTGCTACTTAGGGC | Specific |
|  | 1861695R | CGGACCTTGCCCTGAGGAG |  |
| Alien_mH | 5571044F | TGCAGTGGAAAGTGCGGC | Specific |
|  | 5571044R | CGGTAGATAGAAGATGAGACTTTACC |  |
| Alien_mJ | 5570850F | TGCAGGCGGTCCTGGACAGG | Specific |
|  | 5570850R | CGGCCGCCCTCACCACAC |  |
| Alien_mK | 5565089F | TGCAGCATTGGCAAATAACAC | Specific |
|  | 5565089R | GGTTGCATTCTCTGTGTATCAC |  |
| Rf-Ms1-CD | Rf-CD-F335: | CGAAGGTACGCGCACG | Codominant |
|  | Rf-CD-R740: | AGCAGGCAAATACCATAGTCGAAC |  |
| 3-gene-CD | F35H-CD-F919: | CTAGGGTAAACCACACACACATAC | Codominant |
|  | F35H-CD-R1088: | CGCCGTGAACAGGTTCTG |  |
| IWA7268 (Probus) | 7268-Allele X | GAAGGTGACCAAGTTCATGCTAGGGCTAAAGCAATAACTGGGAAATT | KASP |
|  | 7268-Allele Y | GAAGGTCGGAGTCAACGGATTGGGCTAAAGCAATAACTGGGAAATC |  |
|  | 7268-Common | ATCGGCTATGACAAGTACATGGAATTCAT |  |
| IWB34257 (Probus) | 34257-Allele X | GAAGGTGACCAAGTTCATGCTAATTCTTCTGATGTTAATGCTTATATTTTACTA | KASP |
|  | 34257-Allele Y | GAAGGTCGGAGTCAACGGATTAATTCTTCTGATGTTAATGCTTATATTTTACTG |  |
|  | 34257-Common | ACAACATTTTCACACATTTTGAGTTCTGTA |  |
|  | SC_76_MYB480 F | CGAAGACAAAATGGCGAAGGAAGGGGTGAAGA | Cloning |
|  | SC_77_MYB480 R | CGAAGACAAAAGCTTAACTCGATGATGTGTGAGAGTTGG | MYB480 |
|  | SC_78_MYB618 F | CGAAGACAAAATGGGGAGGATGGCGAAGGAA | Cloning |
|  | SC_79_MYB618 R | CGAAGACAAAAGCTTAATCCGGCATCTCCACAGAGTTTA | MYB618 |
|  | SC_80_MYC480 F1 | CGAAGACAAAATGCGGGAAATAGCTACTCAGCAG | Cloning |
|  | SC_81_MYC480 R1 | CGAAGACAATGATCCATCTATCTTCGAGAGGATG | MYC480 |
|  | SC_82_MYC480 F2 | CGAAGACAAATCATGGACGAGCCCTTTGAGTTTA |  |
|  | SC_83_MYC480 R2 | CGAAGACAACTCCCGGCGCCTTCTCTC |  |
|  | SC_84_MYC480 F3 | CGAAGACAAGGAGAAACTCAACGAGATGTTCCTG |  |
|  | SC_85_MYC480 R3 | CGAAGACAAAAGCCTATATAGCTTTCTGAAGCGCTTCGGT |  |
|  | SC_86 MYC616 F1 | CGAAGACAAAATGCGGGAAATAGCTACTCAGCG | Cloning |
|  | SC_87_MYC616 R1 | CGAAGACAACTCCCGGCGCCTTCTCTCT | MYC616 |
|  | SC_88_MYC616 F2 | CGAAGACAAGGAGAAACTCAACGAGATGTTCCTG |  |
|  | SC_89_MYC616 R2 | CGAAGACAAAAGCCTATATAGCTTTCTGAAGTGTTTCGGTGAT |  |
